# Supplementary material
Source: publisher figshare collection journal article supplement (https://gsapubs.figshare.com/ndownloader/files/22409886)
Supplement: Supplementary file 1 [file 22409886]

Table S1. Porosity vs. Depth Curves. The porosity vs. depth curves used in this model are provided. Porosity values, e.g. porosity at the surface and calculated porosity, are in volume percent. Depths, decay constant and depth ranges, are given in meters (m). These curves are shown on Figure S1.

Table S-1. Porosity vs. Depth Curves

Clay best Porosity = 82.7 e-depth/418 < 172 m

Clay best Porosity = 61.4 e-depth/1676 > 172 m

Clay low Porosity = 45 e-depth/417 < 172 m

Clay low Porosity = 33 e-depth/1674 > 172 m

Clay high Porosity = 90 e-depth/425 < 95

Clay high Porosity = 76 e-depth/1674 > 95

Silt best Porosity = 75 e-depth/419 < 97m

Silt best Porosity = 63 e-depth/1675 > 97m

Silt low Porosity = 60 e-depth/420 < 80

Silt low Porosity = 52 e-depth/1676 > 80

Silt high Porosity = 85 e-depth/418 < 63

Silt high Porosity = 76 e-depth/1677 > 63

Sand best Porosity = 54.5 e-depth/1648

Sand low Porosity = 40 e-depth/2164

Sand high Porosity = 70 e-depth/3566

Carbonate best Porosity = 88 e-depth/1338

Carbonate low Porosity = 25 e-depth/3126

Carbonate high Porosity = 90 e-depth/1730
